# Supplementary material for: Phototransformation of extracellular polymeric substances in activated sludge and their interaction with microplastics
Source: Royal Society of Chemistry journal article supplement (doi:10.1039/d3ra04027e), 2023-01-01
Supplement: d3ra04027e1.pdf [file d3ra04027e1.pdf]

## 26 1. Experimental

### 27 1.1 Adsorption kinetics

28 The adsorption kinetics of EPS on PSMPs were described using the pseudo first-  
29 (Eq. (1)) and second-order model (Eq. (2)), respectively <sup>1</sup>:

30 
$$\ln (q_e + q_t) = \ln q_e - k_1 t \quad (1)$$

31 
$$\frac{t}{q_t} = \frac{1}{k_2 q_e^2} + \frac{t}{q_e} \quad (2)$$

32 where  $k_1$  ( $\text{h}^{-1}$ ) and  $k_2$  ( $\text{g mg C}^{-1}\text{h}^{-1}$ ) were the rate constants for the pseudo first- and  
33 second-order models, respectively,  $q_e$  ( $\text{mg C g}^{-1}$ ) and  $q_t$  ( $\text{mg C g}^{-1}$ ) were the amounts of  
34 solute adsorbed per unit adsorbent at equilibrium and at time  $t$  (h), respectively.

### 35 1.2 Adsorption isotherm

36 The Langmuir (Eq. (3)), and Freundlich (Eq. (4)) model were employed to fit the  
37 equilibrium adsorption data of EPS on PSMPs <sup>1, 2</sup>.

38 
$$q_e = \frac{q_{\max} K_L C_e}{1 + K_L C_e} \quad (3)$$

39 
$$q_e = K_F C_e^{1/n} \quad (4)$$

40 where  $q_e$  ( $\text{mg C/g}$ ) and  $q_{\max}$  ( $\text{mg C /g}$ ) were absorbed amount of EPS on PSMPs at  
41 equilibrium and the maximum sorption capacity of EPS ( $\text{mg C/g}$ ), respectively.  $K_L$   
42 ( $\text{L/(mg C)}$ ) is the Langmuir adsorption equilibrium constant related to the energy or net  
43 enthalpy.  $K_F$  ( $\text{L/(mg C)}$ ) was the Freundlich adsorption equilibrium constant indicating  
44 the relative adsorption capacity of the adsorbent,  $n$  was the Freundlich constant  
45 representing the intensity of adsorption.

## 46 2. Reference

- 47 1. F. Wang, J. Yao, H. Chen, Z. Yi and B. Xing, *Environ. Pollut.*, 2013, **180**, 1-6.  
48 2. F. F. Liu, J. L. Fan, S.-g. Wang and G.-h. Ma, *Chem. Eng. J.*, 2013, **219**, 450-458.  
49

51

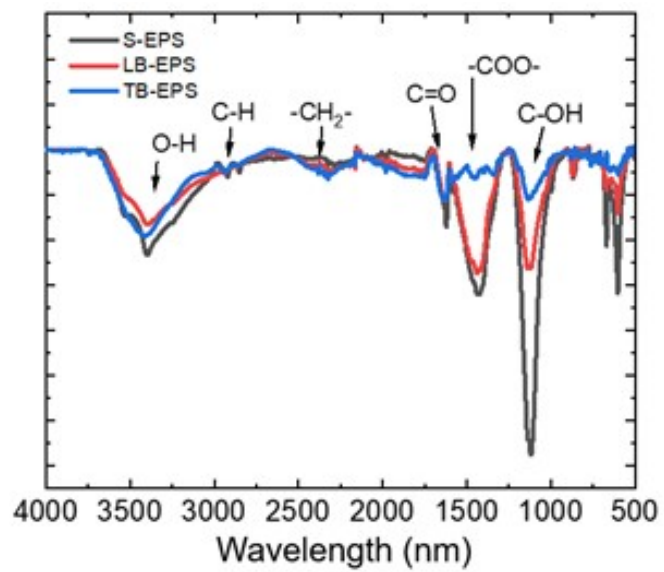

52

53

54

Figure S1 FTIR spectra of EPS

55

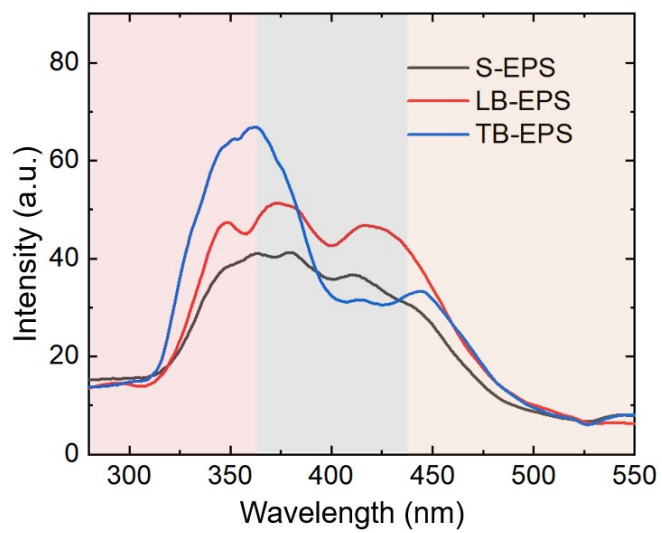

56

57

Figure S2 Synchronous fluorescence of EPS

58

59

60

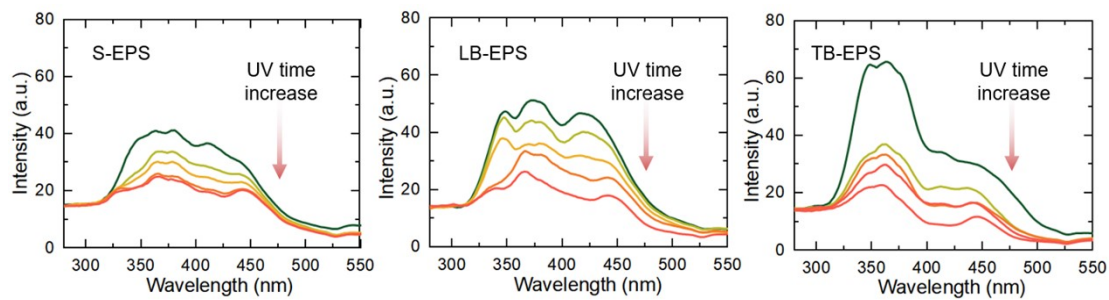

61

62 Figure S3 Synchronous fluorescence of S-EPS, LB-EPS, TB-EPS during S2

63

phototransformation

64

65

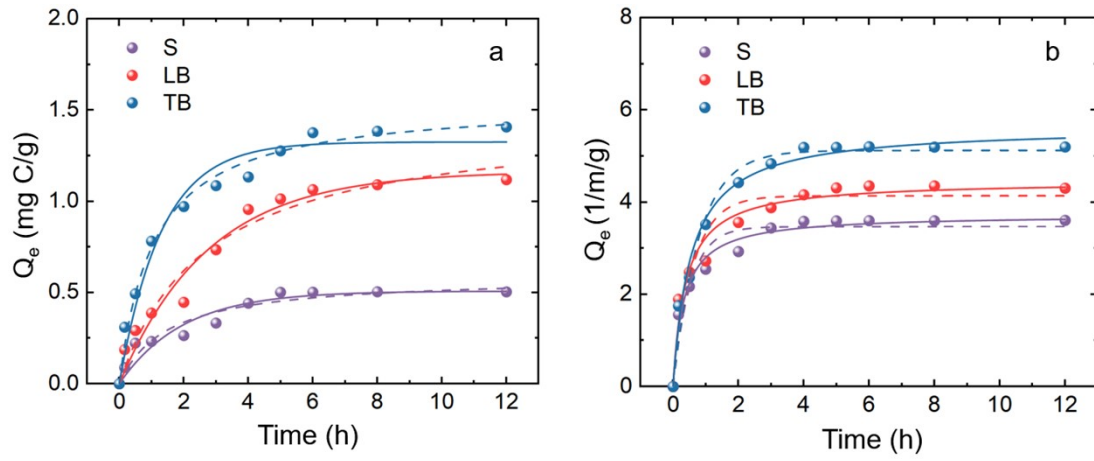

66

67 Figure S4 Based on (a) TOC and (b)  $UV_{254}$  analysis, adsorption kinetics of PSMPs on

68 S-EPS, LB-EPS and TB-EPS, primary kinetics (dashed line), secondary kinetics

69 (solid line)

70

71

72

Table S1 Adsorption kinetics of EPS adsorbed by PSMPs

| Measurements                            | EPSs   | Pseudo first-order model         |                             |                | Pseudo second-order model        |                                                  |                                                   |                |
|-----------------------------------------|--------|----------------------------------|-----------------------------|----------------|----------------------------------|--------------------------------------------------|---------------------------------------------------|----------------|
|                                         |        | $q_e$<br>(mg C·g <sup>-1</sup> ) | $k_l$<br>(h <sup>-1</sup> ) | R <sup>2</sup> | $q_e$<br>(mg C·g <sup>-1</sup> ) | $k_2$<br>(g mg C <sup>-1</sup> h <sup>-1</sup> ) | $v_0$<br>(mg C·g <sup>-1</sup> ·h <sup>-1</sup> ) | R <sup>2</sup> |
| TOC<br>(mg C·L <sup>-1</sup> )          | S-EPS  | 0.508                            | 0.509                       | 0.925          | 0.588                            | 0.454                                            | 0.157                                             | 0.940          |
|                                         | LB-EPS | 1.16                             | 0.363                       | 0.966          | 1.46                             | 0.600                                            | 1.28                                              | 0.961          |
|                                         | TB-EPS | 1.32                             | 0.764                       | 0.964          | 1.55                             | 1.14                                             | 2.74                                              | 0.988          |
| UV <sub>254</sub><br>(m <sup>-1</sup> ) | S-EPS  | 3.47                             | 1.26                        | 0.937          | 3.73                             | 0.325                                            | 4.52                                              | 0.979          |
|                                         | LB-EPS | 4.14                             | 1.63                        | 0.917          | 4.46                             | 0.586                                            | 11.7                                              | 0.966          |
|                                         | TB-EPS | 5.12                             | 1.91                        | 0.976          | 5.63                             | 0.606                                            | 19.2                                              | 0.987          |

73

74

Table S2 Langmuir and Freundlich isothermal parameters of the phototransformation of EPS onto PSMPs

| Measurements                    | EPS    | Phototransformation<br>time | Langmuir model                   |                                    |                | Freundlich model                   |       |                |
|---------------------------------|--------|-----------------------------|----------------------------------|------------------------------------|----------------|------------------------------------|-------|----------------|
|                                 |        |                             | $q_m$<br>(mg C·g <sup>-1</sup> ) | $K_L$<br>(L·(mg C) <sup>-1</sup> ) | R <sup>2</sup> | $K_F$<br>(L (mg C) <sup>-1</sup> ) | n     | R <sup>2</sup> |
| DOC<br>(mg C·L <sup>-1</sup> )  | S-EPS  | 0 h                         | 1.38                             | 0.603                              | 0.973          | 0.483                              | 2.224 | 0.987          |
|                                 |        | 8 h                         | 1.22                             | 0.240                              | 0.992          | 0.263                              | 1.81  | 0.998          |
|                                 |        | 48 h                        | 0.954                            | 0.149                              | 0.973          | 0.146                              | 1.63  | 0.972          |
|                                 | LB-EPS | 0 h                         | 1.51                             | 1.46                               | 0.968          | 0.835                              | 3.61  | 0.990          |
|                                 |        | 8 h                         | 1.58                             | 0.191                              | 0.985          | 0.290                              | 1.71  | 0.986          |
|                                 |        | 48 h                        | 0.978                            | 0.273                              | 0.998          | 0.229                              | 1.87  | 0.991          |
|                                 | TB-EPS | 0 h                         | 1.87                             | 1.86                               | 0.994          | 1.23                               | 5.13  | 0.985          |
|                                 |        | 8 h                         | 1.59                             | 0.244                              | 0.995          | 0.351                              | 1.84  | 0.998          |
|                                 |        | 48 h                        | 0.924                            | 0.455                              | 0.978          | 0.313                              | 2.37  | 0.998          |
| $a_{254}$<br>(m <sup>-1</sup> ) | S-EPS  | 0 h                         | 3.13                             | 0.280                              | 0.986          | 0.866                              | 2.45  | 0.987          |
|                                 |        | 8 h                         | 2.70                             | 0.177                              | 0.992          | 0.518                              | 1.92  | 0.991          |
|                                 |        | 48 h                        | 1.93                             | 0.115                              | 0.947          | 0.267                              | 1.70  | 0.950          |
